# Supplementary material for: Oxygen-containing coke species in zeolite-catalyzed conversion of methanol to hydrocarbons
Source: Royal Society of Chemistry journal article supplement (doi:10.1039/c6cy01463a), 2016-01-01
Supplement: c6cy01463a1.pdf [file c6cy01463a1.pdf]

## *Supplementary Information*

### **Oxygen-containing Coke Species in Zeolite-catalyzed Conversion of Methanol to Hydrocarbons**

Zhaohui Liu,<sup>†#</sup> Xinglong Dong,<sup>†#</sup> Xin Liu,<sup>‡#</sup> and Yu Han<sup>†, \*</sup>

<sup>†</sup> King Abdullah University of Science and Technology, Physical Sciences and Engineering Division,  
Advanced Membranes and Porous Materials Center, Thuwal 23955-6900, Saudi Arabia.

E-mail: [yu.han@kaust.edu.sa](mailto:yu.han@kaust.edu.sa)

<sup>‡</sup> School of Chemistry, State Key Laboratory of Fine Chemicals, Dalian University of Technology, Dalian,  
116024, P. R. China.

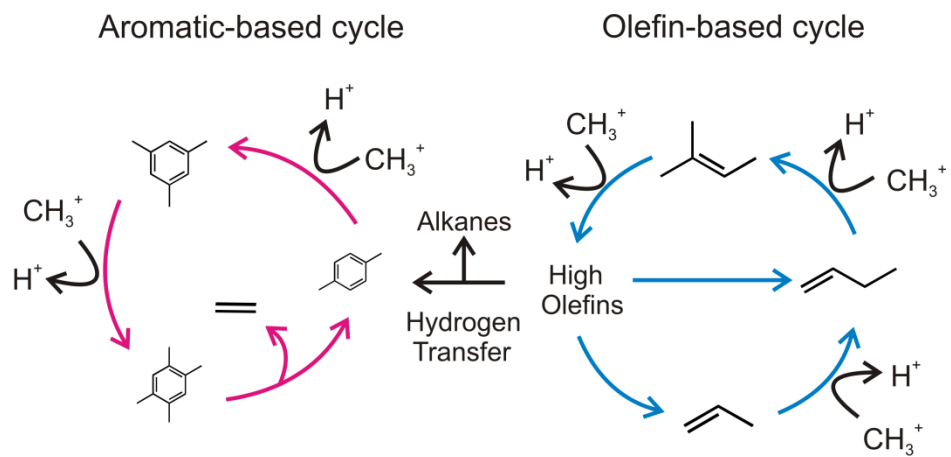

**Scheme S1** Dual aromatic- and olefin-based catalytic cycles for the conversion of methanol to hydrocarbons on zeolite catalysts.<sup>1</sup>

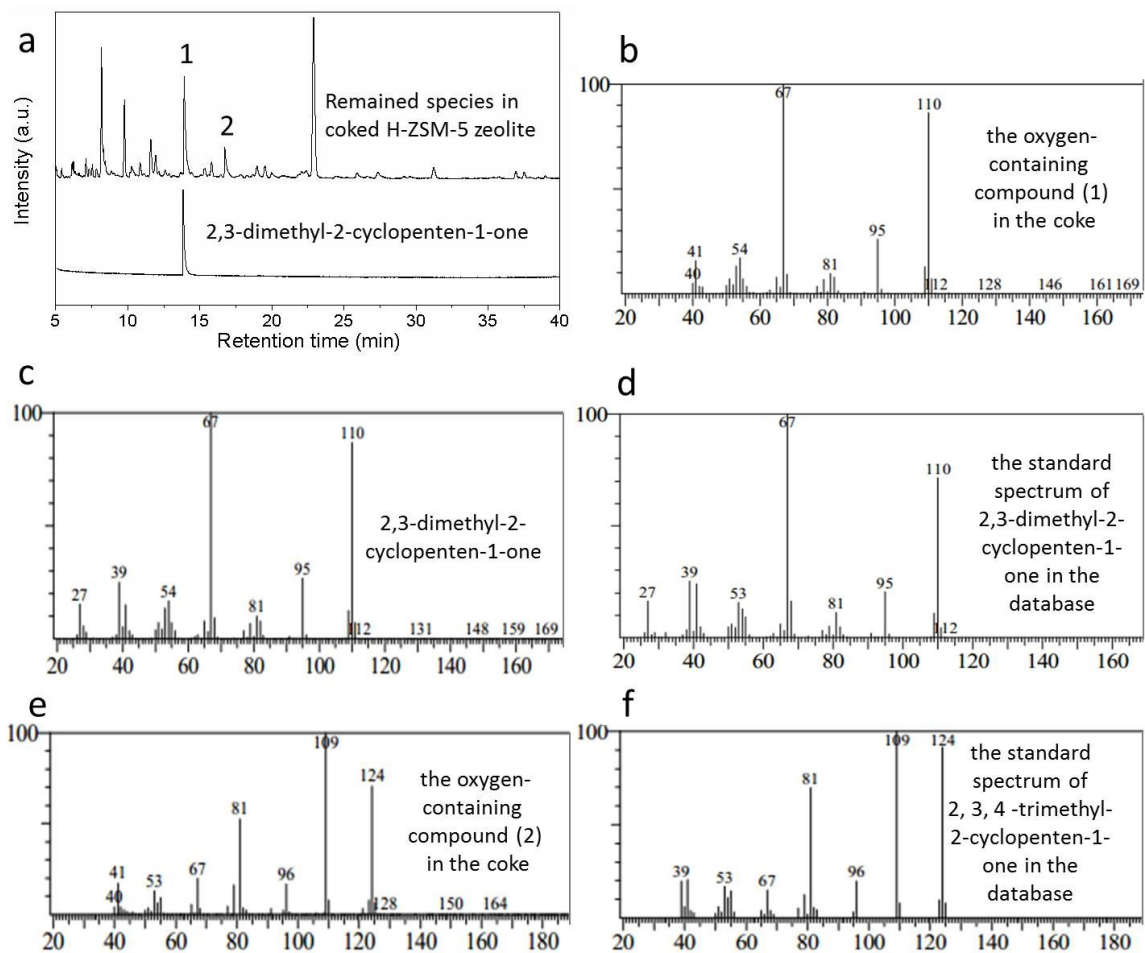

**Fig. S1** (a) GC-MS elution profiles of residual species in coked H-ZSM-5 (Si/Al = 25) zeolite (upper) and 2,3-dimethyl-2-cyclopenten-1-one standard sample (lower) under the same GC conditions. (b)-(f) MS spectra of the oxygen-containing compound (1) in the coke (b), 2,3-dimethyl-2-cyclopenten-1-one (c), the standard spectrum of 2,3-dimethyl-2-cyclopenten-1-one in the database (d), the oxygen-containing compound (2) in the coke (e), and the standard spectrum of 2,3,4-trimethyl-2-cyclopenten-1-one in the database (f). The good agreement between the spectra of the identified compounds with those of standard sample and database records validates the assignments of the compounds.

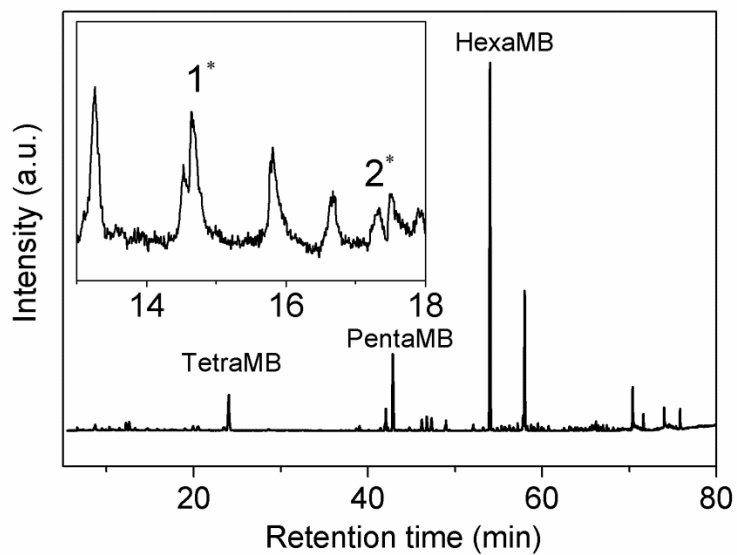

**Fig. S2** The GC-MS elution profile of the residual soluble coke species extracted from the used H-ZSM-5 catalyst with a high Si/Al ratio of 150. The inset shows the enlarged profile of the region where oxygenates are present. 1\* and 2\* label 2,3-dimethyl-2-cyclopenten-1-one and 2,3,4-tri-methyl-2-cyclopenten-1-one, respectively.

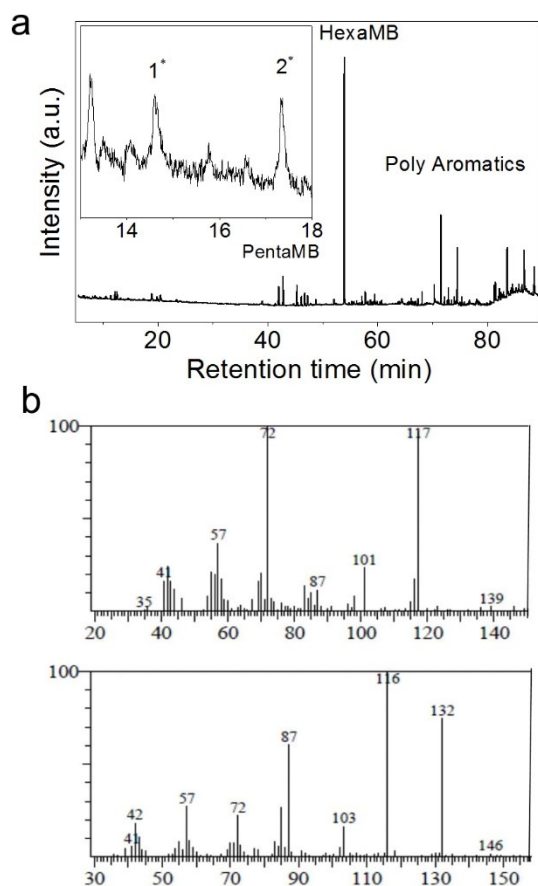

**Fig. S3** (a) The GC-MS elution profile of the residual soluble coke species extracted from the H-Beta catalyst (Si/Al=12.5) using  $^{13}\text{C}$ -MeOH as the feed. The inset shows the enlarged profile of the region where oxygenates are present. 1\* and 2\* label 2, 3-dimethyl-2-cyclopenten-1-one and 2,3,4-tri-methyl-2-cyclopenten-1-one, respectively. (b) MS spectra of the extracted 2, 3-dimethyl-2-cyclopenten-1-one (top) and 2, 3, 4-trimethyl-2-cyclopenten-1-one (bottom).

The figure below shows the cluster model of H-ZSM-5 subdivided into two ONIOM layers: the inner 14T cluster (balls) was computed with the B3LYP/6-31G(d,p) level of theory, and the remainder (lines) was treated with the universal force field (UFF) method (Gray: silicon, Red: oxygen, Pink: aluminum, White: hydrogen).<sup>2-5</sup>

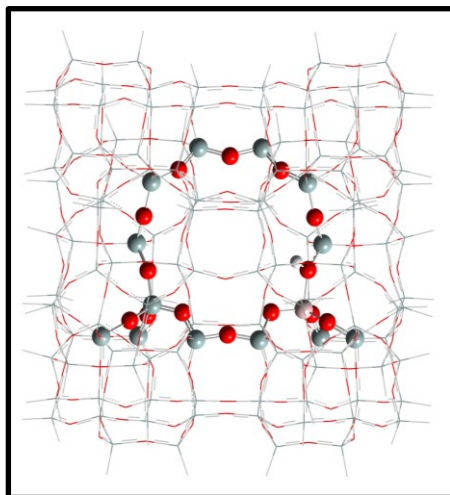

## References

- 1 S. Ilias and A. Bhan, *J. Catal.*, 2012, **290**, 186-192.
- 2 A. H. de Vries, P. Sherwood, S. J. Collins, A. M. Rigby, M. Rigutto and G. J. Kramer, *J. Phys. Chem. B*, 1999, **103**, 6133-6141.
- 3 H. V. Brand, L. A. Curtiss and L. E. Iton, *J. Phys. Chem.*, 1992, **96**, 7725-7732.
- 4 H. Lerner, M. Draeger, J. Steffen and K. K. Unger, *Zeolites*, 1985, **5**, 131-134.
- 5 D. H. Olson, G. T. Kokotailo, S. L. Lawton and W. M. Meier, *J. Phys. Chem.*, 1981, **85**, 2238-2243.
